# Supplementary material
Source: Springer Nature journal article supplement (https://www.springermedizin.de/resource/supplementary/13099_2012_65_MOESM3_ESM.pdf/9665478)

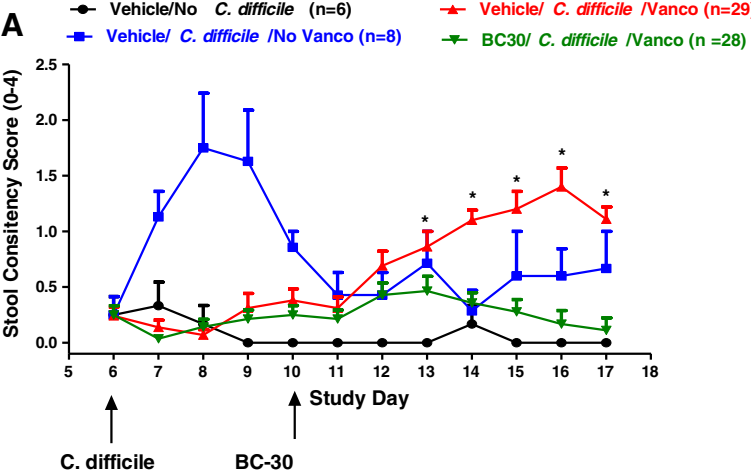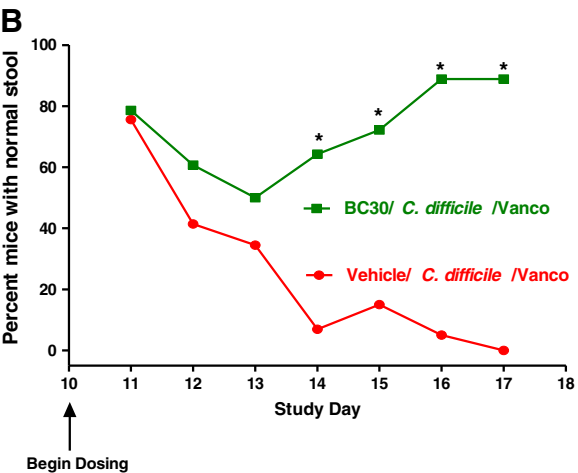

Supplement: MOESM3 [file 9665478]
